# Supplementary material
Source: MDPI journal article supplement (https://www.mdpi.com/2073-4395/12/11/2797)
Supplement: s1 [file s1 › agronomy-1973746-supplementary.pdf]

## SUPPLEMENTARY

The current document is a supplementary file for the article:

# The Composition of Dissolved Organic Matter in Arable Lands: Does Soil Management Practice Matter?

Thulfiqar Al-Graiti <sup>1,2,3</sup>, Gergely Jakab <sup>1,2,\*</sup>, Noémi Ujházy <sup>2</sup>, Anna Vancsik <sup>1,2</sup>, Nándor Fodor <sup>4</sup>, Tamás Árendás <sup>4</sup>, Balázs Madarász <sup>2,5</sup>, Zoltán Barcza <sup>6,7</sup>, Károly Márialigeti <sup>8</sup>, and Zoltán Szalai <sup>1,2</sup>

<sup>1</sup> Department of Environmental and Landscape Geography, ELTE Eötvös Loránd University H-1117 Budapest Hungary

<sup>2</sup> Geographical Institute, Research Centre for Astronomy and Earth Sciences H-1112 Budapest Hungary

<sup>3</sup> Department of Ecology, Faculty of Science, University of Kufa, 54001, Najaf, Iraq

<sup>4</sup> Agricultural Institute, Centre for Agricultural Research H-2462 Martonvásár Hungary

<sup>5</sup> Department of Agro-Environmental Studies, Hungarian University of Agriculture and Life Science H-1117 Budapest Hungary

<sup>6</sup> Department of Meteorology, ELTE Eötvös Loránd University H-1117 Budapest Hungary

<sup>7</sup> Faculty of Forestry and Wood Sciences, Czech University of Life Sciences Prague, 165 21 Prague 6, Czech Republic

<sup>8</sup> Department of Microbiology Eötvös Loránd University H-1117 Budapest Hungary

\* Correspondence: jakab.gergely@csfk.org

## SUPPLEMENTARY

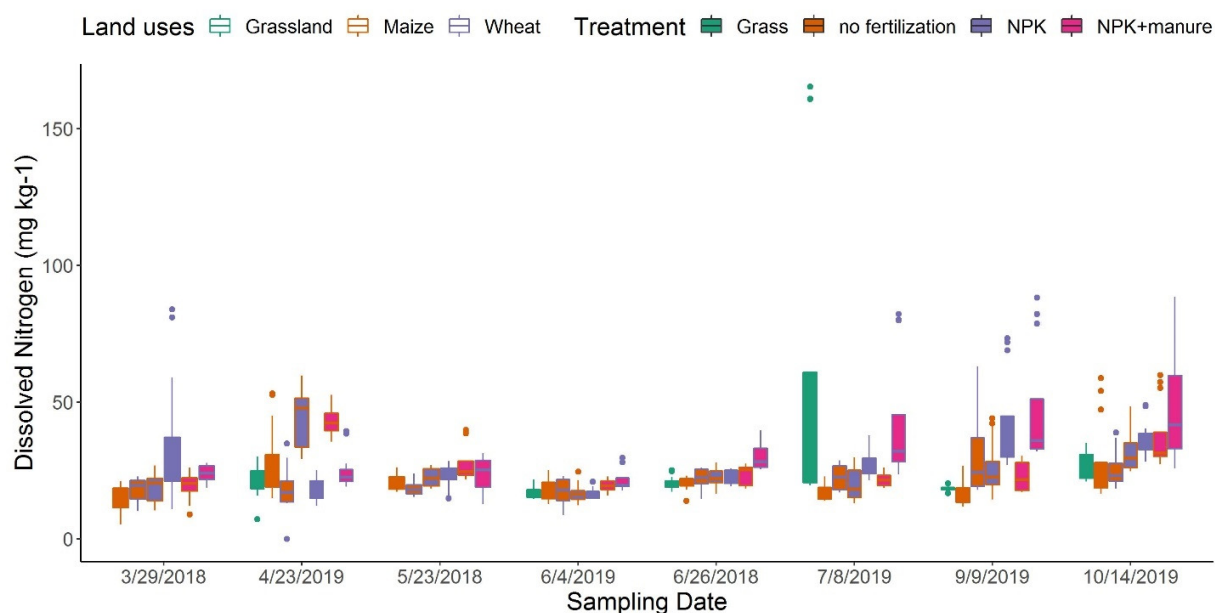

**Figure S1.** The total dissolved nitrogen (DN) concentrations in cropland and grassland plots under different treatments and across crop cover. The total sample size (n=648) and dots indicate outliers.

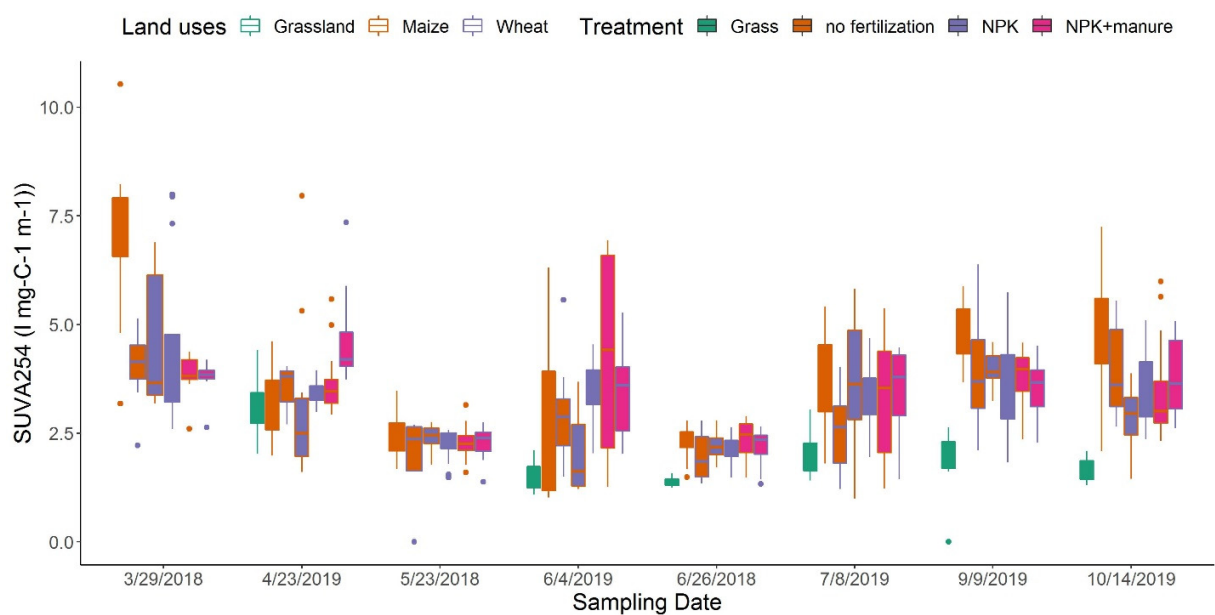

**Figure S2.** The specific absorbance (SUVA<sub>254</sub>) in cropland and grassland plots under different treatments and across crop cover. The total sample size (n=648) and dots indicate outliers.

## SUPPLEMENTARY

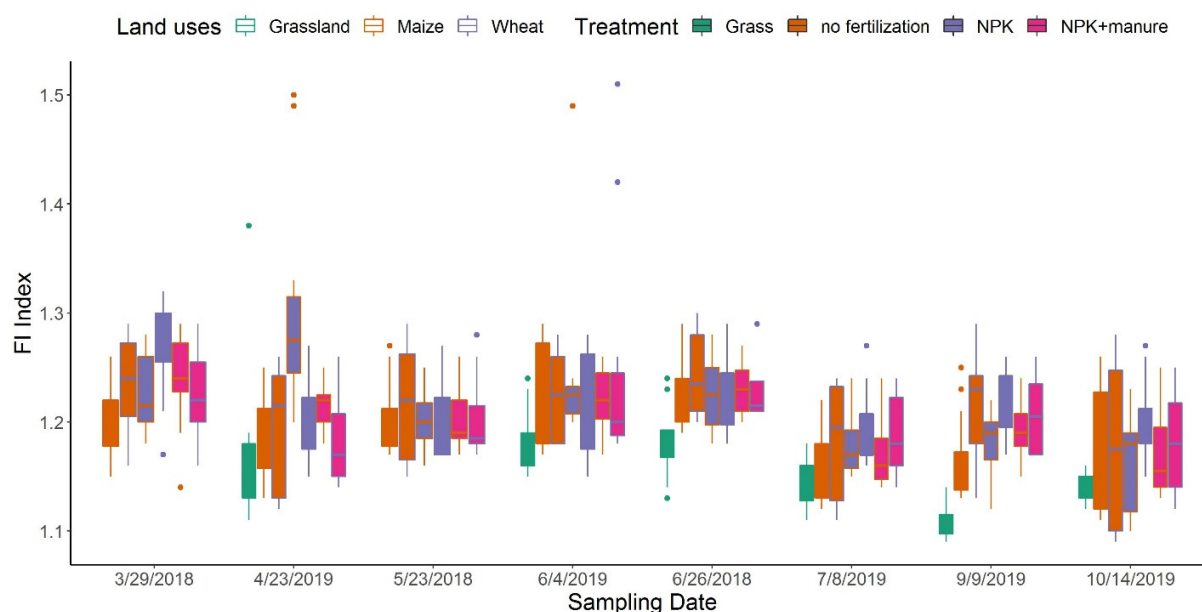

**Figure S3.** The fluorescence index (FI) in cropland and grassland plots under different treatments and across crop cover. The total sample size ( $n=648$ ) and dots indicate outliers. Each treatment and crop cover had a sample size ( $n=12$ ), except that it had ( $n=11$ ) under wheat cover for NPK and NPK+manure treatments in March 2018 and NPK+manure under Maize cover in May 2018.

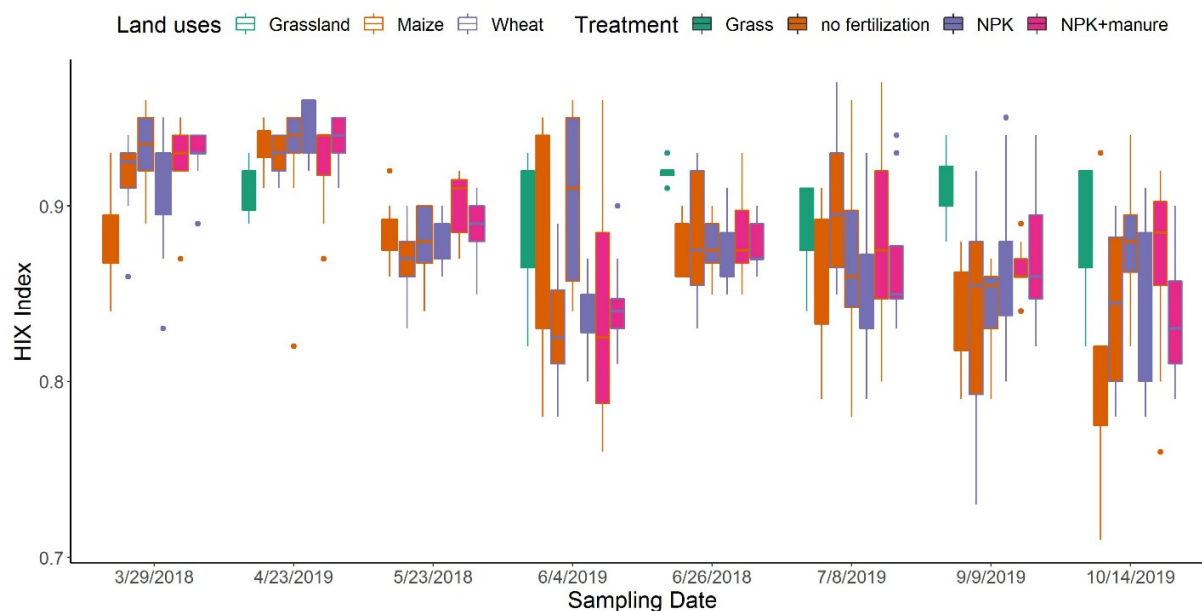

**Figure S4.** The humification index (HIX) in cropland and grassland sites was under different treatments and across crop cover. The total sample size ( $n=648$ ) and dots indicate outliers. Each treatment and crop cover had a sample size ( $n=12$ ), except that it had ( $n=11$ ) under wheat cover for NPK and NPK+manure treatments in March 2018 and NPK+manure under Maize cover in May 2018.

## SUPPLEMENTARY

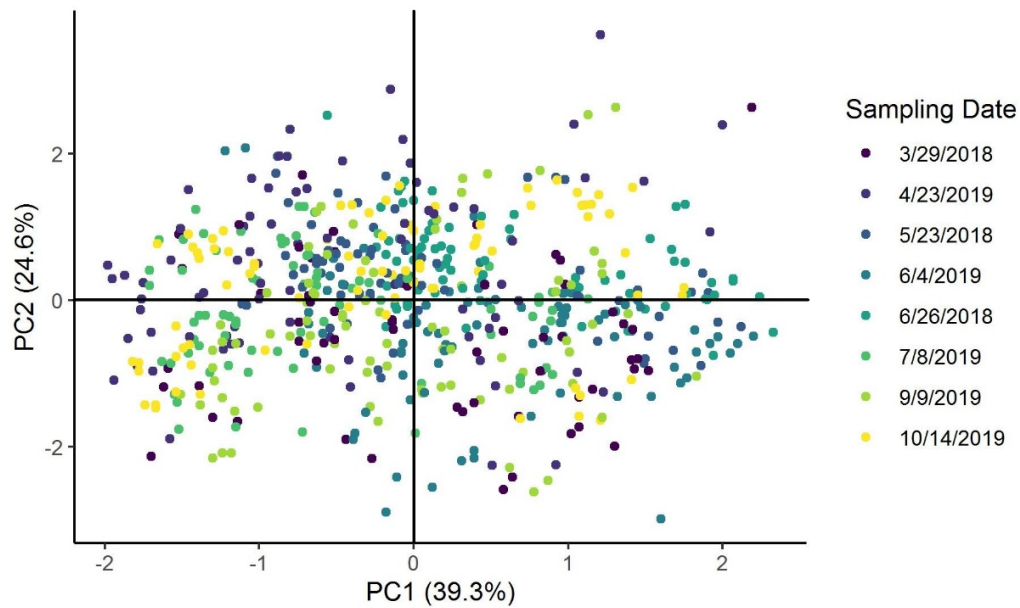

**Figure S5.** Principle component analysis (PCA) scores for component 1 and 2. Colors highlighted the sampling date effects.

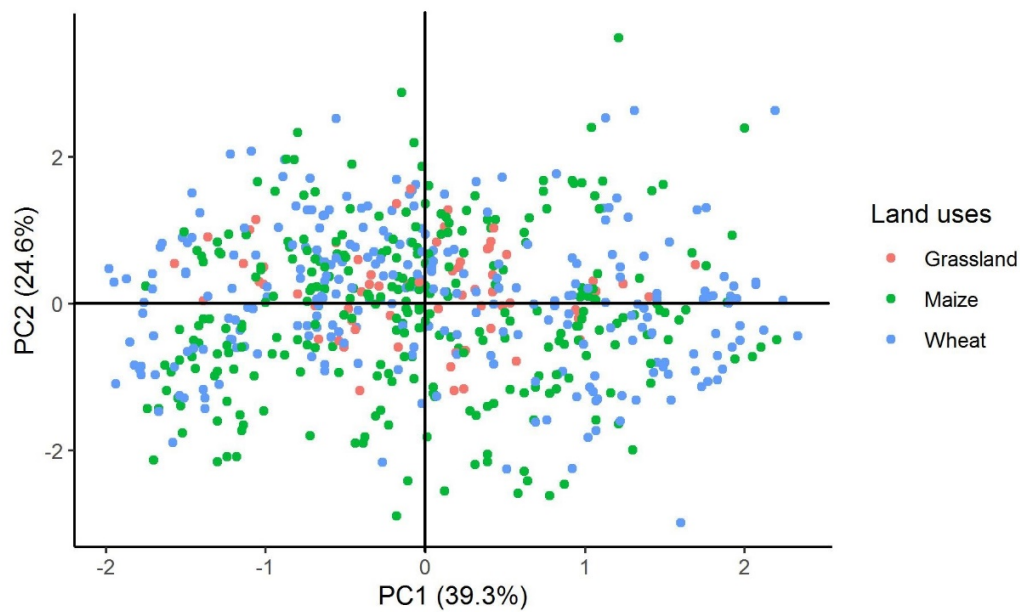

**Figure S6.** Principle component analysis (PCA) scores for component 1 and 2. Colors highlighted the land-uses (Crop cover) effects.

## SUPPLEMENTARY

### Detailed Statistical Data

1- The table shows the corresponding defined date group for each sampling date.

| Sampling Date              | Defined Date Group in SPSS |
|----------------------------|----------------------------|
| June, 2018 (6/26/2018)     | 1                          |
| April, 2019 (4/23/2019)    | 2                          |
| July, 2019 (7/8/2019)      | 3                          |
| June, 2019 (6/4/2019)      | 4                          |
| October, 2019 (10/14/2019) | 5                          |
| September, 2019 (9/9/2019) | 6                          |

2- The tables show the Mann-Whitney test and test statistics for the C/N ratio.

#### Mann-Whitney Test

| Ranks |           |    |           |              |
|-------|-----------|----|-----------|--------------|
|       | DateGroup | N  | Mean Rank | Sum of Ranks |
| C_N   | 1         | 12 | 7.42      | 89.00        |
|       | 2         | 12 | 17.58     | 211.00       |
|       | Total     | 24 |           |              |

#### Test Statistics<sup>a</sup>

|                                | C_N                |
|--------------------------------|--------------------|
| Mann-Whitney U                 | 11.000             |
| Wilcoxon W                     | 89.000             |
| Z                              | -3.522             |
| Asymp. Sig. (2-tailed)         | <.001              |
| Exact Sig. [2*(1-tailed Sig.)] | <.001 <sup>b</sup> |

a. Grouping Variable: DateGroup

b. Not corrected for ties.

#### Mann-Whitney Test

| Ranks |           |    |           |              |
|-------|-----------|----|-----------|--------------|
|       | DateGroup | N  | Mean Rank | Sum of Ranks |
| C_N   | 2         | 12 | 17.88     | 214.50       |
|       | 3         | 12 | 7.13      | 85.50        |
|       | Total     | 24 |           |              |

## SUPPLEMENTARY

### Test Statistics<sup>a</sup>

|                                | C_N                |
|--------------------------------|--------------------|
| Mann-Whitney U                 | 7.500              |
| Wilcoxon W                     | 85.500             |
| Z                              | -3.725             |
| Asymp. Sig. (2-tailed)         | <.001              |
| Exact Sig. [2*(1-tailed Sig.)] | <.001 <sup>b</sup> |

a. Grouping Variable: DateGroup

b. Not corrected for ties.

### Mann-Whitney Test

#### Ranks

|     | DateGroup | N  | Mean Rank | Sum of Ranks |
|-----|-----------|----|-----------|--------------|
| C_N | 2         | 12 | 17.42     | 209.00       |
|     | 4         | 12 | 7.58      | 91.00        |
|     | Total     | 24 |           |              |

### Test Statistics<sup>a</sup>

|                                | C_N                |
|--------------------------------|--------------------|
| Mann-Whitney U                 | 13.000             |
| Wilcoxon W                     | 91.000             |
| Z                              | -3.406             |
| Asymp. Sig. (2-tailed)         | <.001              |
| Exact Sig. [2*(1-tailed Sig.)] | <.001 <sup>b</sup> |

a. Grouping Variable: DateGroup

b. Not corrected for ties.

### Mann-Whitney Test

#### Ranks

|     | DateGroup | N  | Mean Rank | Sum of Ranks |
|-----|-----------|----|-----------|--------------|
| C_N | 2         | 12 | 18.25     | 219.00       |
|     | 5         | 12 | 6.75      | 81.00        |
|     | Total     | 24 |           |              |

## SUPPLEMENTARY

### Test Statistics<sup>a</sup>

|                                | C_N                |
|--------------------------------|--------------------|
| Mann-Whitney U                 | 3.000              |
| Wilcoxon W                     | 81.000             |
| Z                              | -3.984             |
| Asymp. Sig. (2-tailed)         | <.001              |
| Exact Sig. [2*(1-tailed Sig.)] | <.001 <sup>b</sup> |

a. Grouping Variable: DateGroup

b. Not corrected for ties.

### Mann-Whitney Test

#### Ranks

|     | DateGroup | N  | Mean Rank | Sum of Ranks |
|-----|-----------|----|-----------|--------------|
| C_N | 2         | 12 | 18.50     | 222.00       |
|     | 6         | 12 | 6.50      | 78.00        |
|     | Total     | 24 |           |              |

### Test Statistics<sup>a</sup>

|                                | C_N                |
|--------------------------------|--------------------|
| Mann-Whitney U                 | .000               |
| Wilcoxon W                     | 78.000             |
| Z                              | -4.157             |
| Asymp. Sig. (2-tailed)         | <.001              |
| Exact Sig. [2*(1-tailed Sig.)] | <.001 <sup>b</sup> |

a. Grouping Variable: DateGroup

b. Not corrected for ties.

## SUPPLEMENTARY

3- The tables show the Mann-Whitney test and test statistics for the BIX index.

### Mann-Whitney Test

| Ranks |           |    |           |              |
|-------|-----------|----|-----------|--------------|
|       | DateGroup | N  | Mean Rank | Sum of Ranks |
| BIX   | 1         | 12 | 18.50     | 222.00       |
|       | 2         | 12 | 6.50      | 78.00        |
|       | Total     | 24 |           |              |

### Test Statistics<sup>a</sup>

| BIX                            |                    |
|--------------------------------|--------------------|
| Mann-Whitney U                 | .000               |
| Wilcoxon W                     | 78.000             |
| Z                              | -4.174             |
| Asymp. Sig. (2-tailed)         | <.001              |
| Exact Sig. [2*(1-tailed Sig.)] | <.001 <sup>b</sup> |

a. Grouping Variable: DateGroup

b. Not corrected for ties.

### Mann-Whitney Test

| Ranks |           |    |           |              |
|-------|-----------|----|-----------|--------------|
|       | DateGroup | N  | Mean Rank | Sum of Ranks |
| BIX   | 2         | 12 | 9.17      | 110.00       |
|       | 3         | 12 | 15.83     | 190.00       |
|       | Total     | 24 |           |              |

### Test Statistics<sup>a</sup>

| BIX                            |                   |
|--------------------------------|-------------------|
| Mann-Whitney U                 | 32.000            |
| Wilcoxon W                     | 110.000           |
| Z                              | -2.345            |
| Asymp. Sig. (2-tailed)         | .019              |
| Exact Sig. [2*(1-tailed Sig.)] | .020 <sup>b</sup> |

a. Grouping Variable: DateGroup

b. Not corrected for ties.

## SUPPLEMENTARY

### Mann-Whitney Test

| Ranks |           |    |           |              |
|-------|-----------|----|-----------|--------------|
|       | DateGroup | N  | Mean Rank | Sum of Ranks |
| BIX   | 2         | 12 | 7.50      | 90.00        |
|       | 4         | 12 | 17.50     | 210.00       |
|       | Total     | 24 |           |              |

### Test Statistics<sup>a</sup>

|                                | BIX                |
|--------------------------------|--------------------|
| Mann-Whitney U                 | 12.000             |
| Wilcoxon W                     | 90.000             |
| Z                              | -3.474             |
| Asymp. Sig. (2-tailed)         | <.001              |
| Exact Sig. [2*(1-tailed Sig.)] | <.001 <sup>b</sup> |

a. Grouping Variable: DateGroup

b. Not corrected for ties.

### Mann-Whitney Test

| Ranks |           |    |           |              |
|-------|-----------|----|-----------|--------------|
|       | DateGroup | N  | Mean Rank | Sum of Ranks |
| BIX   | 2         | 12 | 6.75      | 81.00        |
|       | 5         | 12 | 18.25     | 219.00       |
|       | Total     | 24 |           |              |

### Test Statistics<sup>a</sup>

|                                | BIX                |
|--------------------------------|--------------------|
| Mann-Whitney U                 | 3.000              |
| Wilcoxon W                     | 81.000             |
| Z                              | -4.014             |
| Asymp. Sig. (2-tailed)         | <.001              |
| Exact Sig. [2*(1-tailed Sig.)] | <.001 <sup>b</sup> |

a. Grouping Variable: DateGroup

b. Not corrected for ties.

## SUPPLEMENTARY

### Mann-Whitney Test

| Ranks |           |    |           |              |
|-------|-----------|----|-----------|--------------|
|       | DateGroup | N  | Mean Rank | Sum of Ranks |
| BIX   | 2         | 12 | 7.08      | 85.00        |
|       | 6         | 12 | 17.92     | 215.00       |
|       | Total     | 24 |           |              |

### Test Statistics<sup>a</sup>

|                                | BIX                |
|--------------------------------|--------------------|
| Mann-Whitney U                 | 7.000              |
| Wilcoxon W                     | 85.000             |
| Z                              | -3.798             |
| Asymp. Sig. (2-tailed)         | <.001              |
| Exact Sig. [2*(1-tailed Sig.)] | <.001 <sup>b</sup> |

a. Grouping Variable: DateGroup

b. Not corrected for ties.
